# Supplementary material for: Mesozooplankton grazing minimally impacts phytoplankton abundance during spring in the western North Atlantic
Source: PeerJ journal article supplement (doi:10.7717/peerj.9430), 2020-07-17

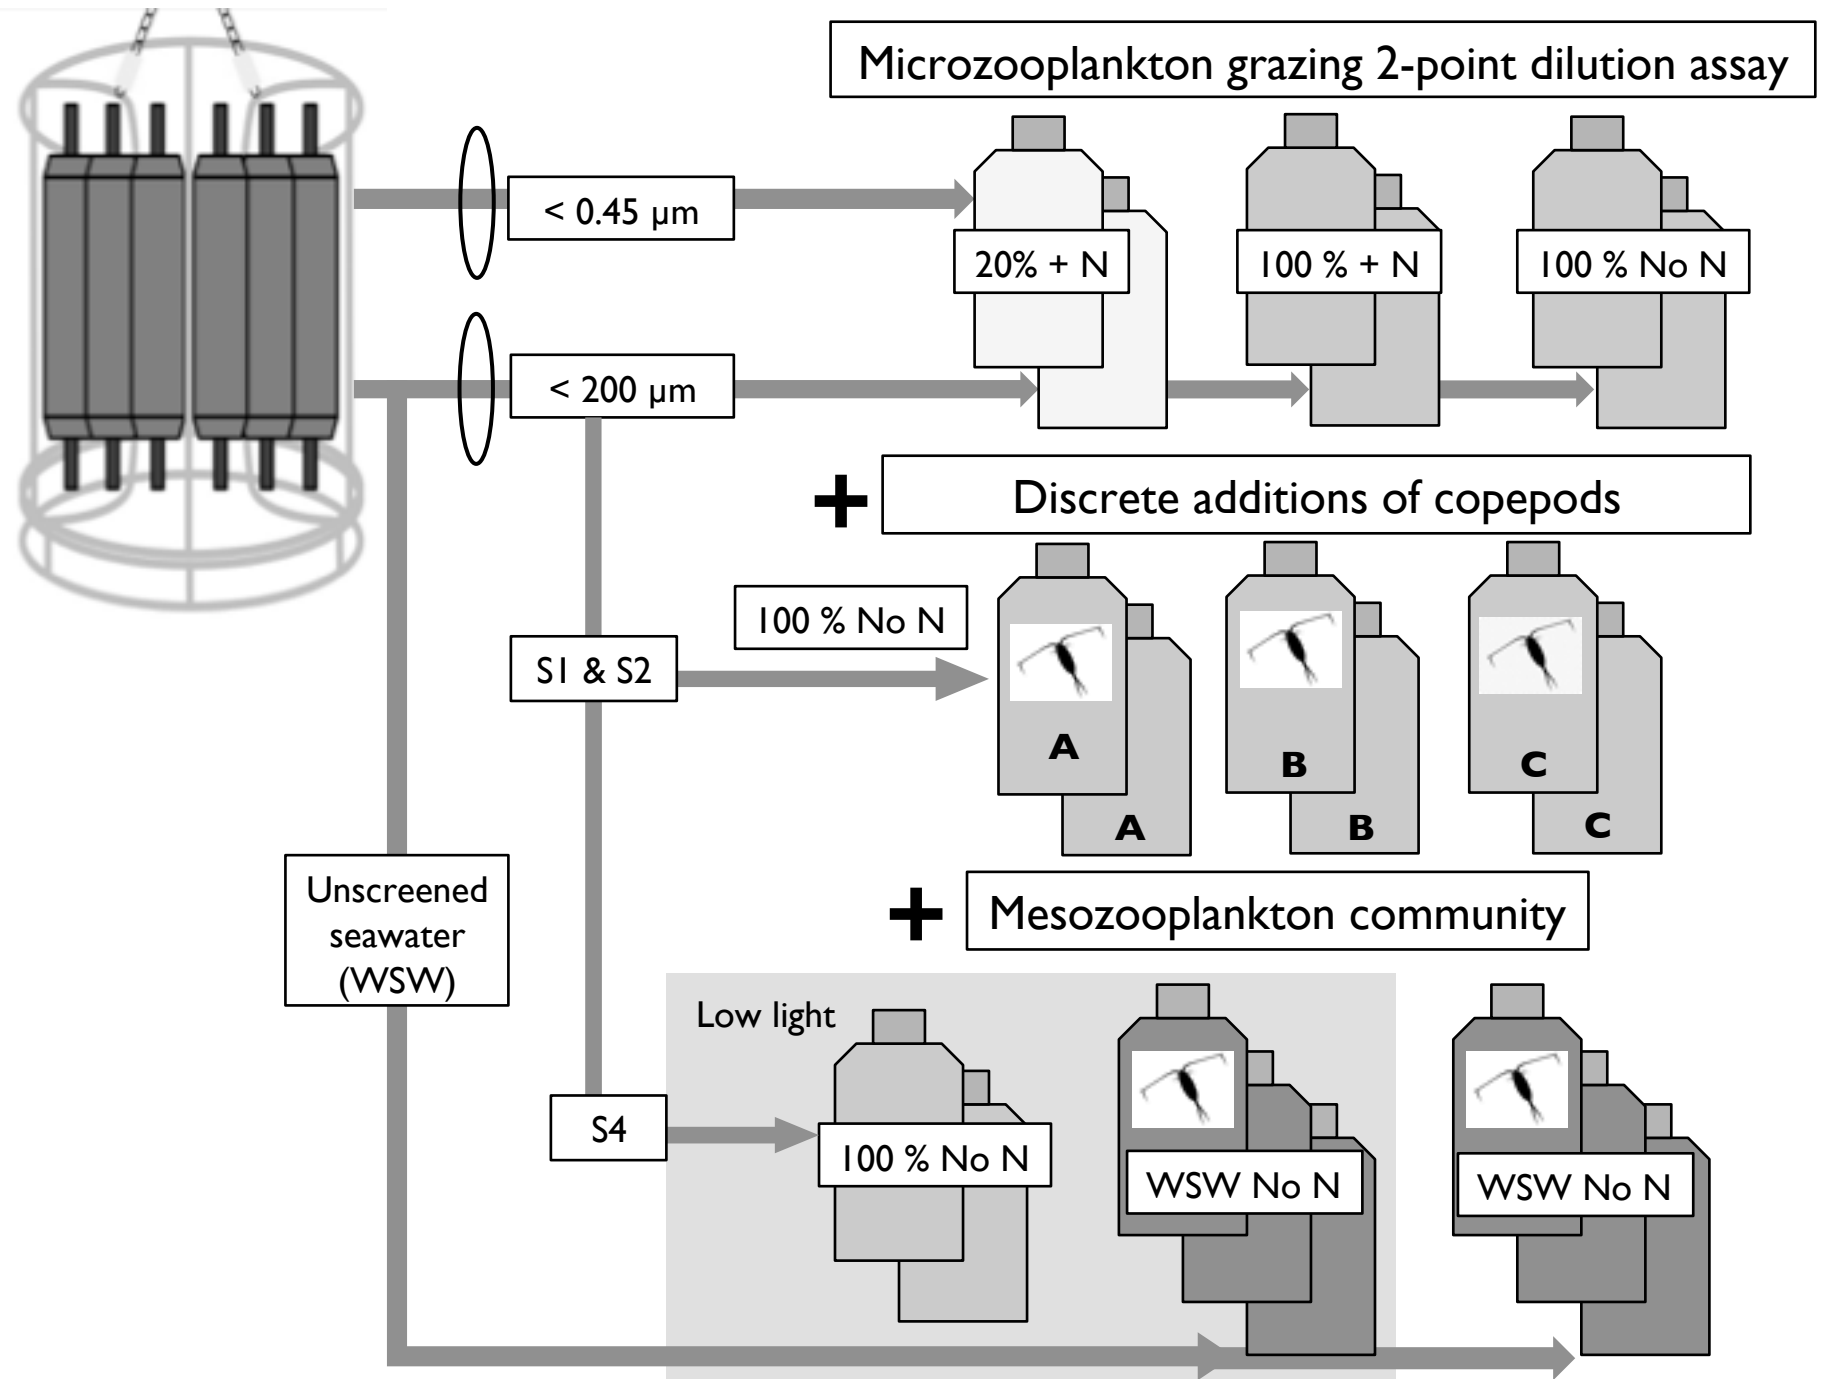

Supplement: Morison_et_al_FigS1.pdf [file Morison_et_al_FigS1.pdf]
